# Supplementary material for: A cross-sectional survey study on the nutrition patterns of patients with peripheral artery disease
Source: Atypon-hosted journal article supplement (doi:10.1024/0301-1526/a001005), 2022-05-02
Supplement: 0301-1526_a001005_esm1.pdf [file 0301-1526_a001005_esm1.pdf]

## Electronic Supplementary Material

**ESM 1.** The frequency rating scale answer including description from rarely to never to three times a day and its value for weighting the servings per week

| <b>Frequency scale answer</b> | <b>Description</b>       | <b>Servings per week</b> |
|-------------------------------|--------------------------|--------------------------|
| 0                             | Rarely or never          | 0                        |
| 1                             | Once a week              | 1                        |
| 2                             | Twice a week             | 2                        |
| 3                             | Three times a week       | 3                        |
| 4                             | Four to six times a week | 5                        |
| 5                             | Once per day             | 7                        |
| 6                             | Twice a day              | 14                       |
| 7                             | Three times a day        | 21                       |
