# Supplementary material for: A cross-sectional survey study on the nutrition patterns of patients with peripheral artery disease
Source: Atypon-hosted journal article supplement (doi:10.1024/0301-1526/a001005), 2022-05-02
Supplement: 0301-1526_a001005_esm2.pdf [file 0301-1526_a001005_esm2.pdf]

## Electronic Supplementary Material

### ESM 2. The calculation of the adapted Mediterranean Diet score of the 11 food groups

| <b>Food</b>                | <b>Question</b>                                                                                                                                                                                      | <b>Frequency scale answer</b> | <b>Point</b> |
|----------------------------|------------------------------------------------------------------------------------------------------------------------------------------------------------------------------------------------------|-------------------------------|--------------|
| <b>Fruits</b>              | How often do you consume fruit (e.g. 1 apple, 1 banana, 1 handful of strawberries, 1 small fruit salad)?                                                                                             | 7                             | 1            |
| <b>Vegetables</b>          | How often do you eat vegetables, salad or raw vegetables (e.g. as side dish to the main course or salad)?                                                                                            | 7                             | 1            |
| <b>Legumes</b>             | How often do you eat legumes (e.g. lentils, peas, beans as a stew or as side dish)?                                                                                                                  | 4–7                           | 1            |
| <b>Cereals</b>             | How often do you eat whole grain bread, cereal flakes, whole grain rice, pasta and potatoes (e.g. 1 slice of bread, 2-3 tablespoons of muesli, rice, pasta as a side dish, 2 medium-sized potatoes)? | 7                             | 1            |
| <b>Dairy products/milk</b> | How often do you consume milk and milk products such as yoghurt, quark, cheese (e.g. 1 glass of milk, 1 small cup of yoghurt, 1 slice of cheese)?                                                    | 1–5                           | 1            |
| <b>Fish</b>                | How often do you eat fish (e.g. as a main course, fish sandwich)?                                                                                                                                    | 5–7                           | 1            |
| <b>Red meat</b>            | How often do you consume red meat (beef, pork, sheep, lamb) as a main course and sausages made from it, e.g. as cold cuts?                                                                           | 0–1                           | 1            |
| <b>Poultry</b>             | How often do you eat poultry (chicken, turkey) as a main course and sausages made from them, e.g. as cold cuts?                                                                                      | 0–3                           | 1            |
| <b>Vegetable oil</b>       | How often do you use vegetable oils such as olive, rapeseed or sunflower oil (e.g. 1 tablespoon to prepare salad, vegetables, cooked dishes)?                                                        | 5–7, if olive or rape oil     | 1            |
| <b>Unsalted nuts</b>       | How often do you eat unsalted nuts such as walnuts, hazelnuts, almonds (e.g. 1 small handful)?                                                                                                       | 4–7                           | 1            |
| <b>Alcohol</b>             | How often do you consume alcoholic beverages such as wine, sparkling wine, beer or hard liquor (e.g. 1 glass of wine, 1 small bottle of beer (0.3 l), 1 small glass of hard liquor)?                 | 1–4                           | 1            |
| <b>Total score</b>         |                                                                                                                                                                                                      |                               | <b>11</b>    |
