# Supplementary material for: A cross-sectional survey study on the nutrition patterns of patients with peripheral artery disease
Source: Atypon-hosted journal article supplement (doi:10.1024/0301-1526/a001005), 2022-05-02
Supplement: 0301-1526_a001005_esm3.pdf [file 0301-1526_a001005_esm3.pdf]

## Electronic Supplementary Material

ESM 3. Frequency of consumption of certain foods and beverages within the last 12 month in this cohort

|                                  | Intermittent claudication |           | Chronic limb-threatening ischaemia |           | Total      |
|----------------------------------|---------------------------|-----------|------------------------------------|-----------|------------|
|                                  | Men                       | Women     | Men                                | Women     |            |
| <b>Number of patients, n</b>     | <b>129</b>                | <b>60</b> | <b>89</b>                          | <b>41</b> | <b>319</b> |
| <b>Fruits</b>                    |                           |           |                                    |           |            |
| Rarely or never, n (%)           | 18 (14.0)                 | 7 (11.7)  | 5 (5.6)                            | 5 (12.2)  | 35 (11.0)  |
| Once or twice a week, n (%)      | 26 (20.2)                 | 9 (15.0)  | 18 (20.3)                          | 6 (14.6)  | 59 (18.5)  |
| Three to six times a week, n (%) | 30 (23.3)                 | 14 (23.4) | 27 (30.3)                          | 7 (17.1)  | 78 (24.5)  |
| At least once a day, n (%)       | 55 (42.7)                 | 30 (50.1) | 39 (43.8)                          | 23 (56.1) | 147 (46.1) |
| <b>Vegetables</b>                |                           |           |                                    |           |            |
| Rarely or never, n (%)           | 5 (3.9)                   | 2 (3.3)   | 1 (1.1)                            | 4 (9.8)   | 12 (3.8)   |
| Once or twice a week, n (%)      | 26 (20.2)                 | 4 (6.7)   | 27 (30.4)                          | 5 (12.2)  | 62 (19.5)  |
| Three to six times a week, n (%) | 56 (43.4)                 | 31 (51.6) | 35 (39.4)                          | 11 (26.8) | 133 (41.6) |
| At least once a day, n (%)       | 41 (31.8)                 | 23 (38.3) | 24 (26.9)                          | 21 (51.2) | 109 (34.2) |
| No answer/I don't know, n (%)    | 1 (0.8)                   | 0 (0)     | 2 (2.2)                            | 0 (0)     | 3 (0.9)    |
| <b>Legumes</b>                   |                           |           |                                    |           |            |
| Rarely or never, n (%)           | 51 (39.5)                 | 27 (45.0) | 30 (33.7)                          | 17 (41.5) | 125 (39.2) |
| Once or twice a week, n (%)      | 69 (53.5)                 | 32 (53.3) | 49 (55.0)                          | 22 (53.6) | 172 (53.9) |
| Three to six times a week, n (%) | 9 (7.0)                   | 1 (1.7)   | 9 (10.1)                           | 1 (2.4)   | 20 (9.3)   |
| No answer/I don't know, n (%)    | 0 (0)                     | 0 (0)     | 1 (1.1)                            | 1 (2.4)   | 2 (0.6)    |
| <b>Cereals</b>                   |                           |           |                                    |           |            |
| Rarely or never, n (%)           | 1 (0.8)                   | 1 (1.7)   | 2 (2.2)                            | 0 (0)     | 4 (1.3)    |
| Once or twice a week, n (%)      | 2 (1.6)                   | 2 (3.3)   | 4 (4.4)                            | 1 (2.4)   | 9 (2.8)    |
| Three to six times a week, n (%) | 16 (12.4)                 | 5 (8.4)   | 14 (15.8)                          | 3 (7.3)   | 38 (11.9)  |
| At least once a day, n (%)       | 110 (84.2)                | 52 (86.7) | 68 (76.5)                          | 38 (90.4) | 247 (83.8) |
| No answer/I don't know, n (%)    | 0 (0)                     | 0 (0)     | 1 (1.1)                            | 0 (0)     | 1 (0.3)    |
| <b>Fish</b>                      |                           |           |                                    |           |            |
| Rarely or never, n (%)           | 31 (24.0)                 | 23 (38.3) | 25 (28.1)                          | 8 (19.5)  | 87 (27.3)  |
| Once or twice a week, n (%)      | 87 (67.5)                 | 33 (55.0) | 54 (60.7)                          | 32 (75.0) | 206 (64.6) |
| Three to six times a week, n (%) | 7 (5.5)                   | 3 (5.0)   | 8 (9.0)                            | 1 (2.4)   | 19 (6.0)   |
| At least once a day, n (%)       | 3 (2.4)                   | 1 (1.7)   | 0 (0)                              | 0 (0)     | 4 (1.2)    |
| No answer/I don't know, n (%)    | 1 (0.8)                   | 1 (1.6)   | 2 (2.2)                            | 0 (0)     | 3 (0.9)    |
| <b>Red meat</b>                  |                           |           |                                    |           |            |
| Rarely or never, n (%)           | 11 (8.5)                  | 7 (11.7)  | 9 (10.1)                           | 8 (19.5)  | 35 (11.0)  |
| Once or twice a week, n (%)      | 27 (21.0)                 | 23 (38.4) | 17 (19.1)                          | 12 (29.2) | 79 (24.8)  |
| Three to six times a week, n (%) | 46 (35.7)                 | 19 (31.7) | 26 (29.2)                          | 12 (29.3) | 103 (32.2) |
| At least once a day, n (%)       | 44 (34.2)                 | 11 (18.3) | 36 (40.4)                          | 9 (21.9)  | 100 (31.4) |
| No answer/I don't know, n (%)    | 1 (0.8)                   | 0 (0)     | 1 (1.1)                            | 0 (0)     | 2 (0.6)    |
| <b>Poultry</b>                   |                           |           |                                    |           |            |
| Rarely or never, n (%)           | 34 (26.4)                 | 19 (31.7) | 20 (22.5)                          | 10 (24.4) | 83 (26.0)  |
| Once or twice a week, n (%)      | 60 (46.5)                 | 33 (55.0) | 45 (50.6)                          | 23 (56.1) | 161 (50.5) |
| Three to six times a week, n (%) | 24 (18.6)                 | 4 (6.7)   | 14 (15.7)                          | 4 (9.7)   | 46 (14.5)  |
| At least once a day, n (%)       | 11 (8.6)                  | 3 (5.0)   | 7 (7.8)                            | 3 (7.3)   | 24 (7.6)   |
| No answer/I don't know, n (%)    | 0 (0)                     | 1 (1.7)   | 3 (3.4)                            | 1 (2.4)   | 5 (1.6)    |

## Electronic Supplementary Material

|                                  |            |           |           |           |            |
|----------------------------------|------------|-----------|-----------|-----------|------------|
| <b>Dairy products/milk</b>       |            |           |           |           |            |
| Rarely or never, n (%)           | 4 (3.1)    | 6 (10.0)  | 6 (6.7)   | 1 (2.4)   | 17 (5.3)   |
| Once or twice a week, n (%)      | 5 (3.9)    | 2 (3.3)   | 8 (9.0)   | 2 (4.9)   | 17 (5.3)   |
| Three to six times a week, n (%) | 17 (12.2)  | 8 (13.4)  | 15 (16.8) | 4 (9.7)   | 44 (13.8)  |
| At least once a day, n (%)       | 103 (79.9) | 44 (73.4) | 59 (67.4) | 34 (82.9) | 241 (75.6) |
| <b>Butter/cream</b>              |            |           |           |           |            |
| Rarely or never, n (%)           | 42 (32.6)  | 10 (16.7) | 17 (19.1) | 7 (17.1)  | 76 (23.8)  |
| Once or twice a week, n (%)      | 11 (8.5)   | 6 (10.0)  | 8 (9.0)   | 4 (9.7)   | 29 (9.1)   |
| Three to six times a week, n (%) | 11 (8.5)   | 10 (16.7) | 8 (9.0)   | 4 (9.7)   | 33 (10.4)  |
| At least once a day, n (%)       | 65 (50.2)  | 34 (56.6) | 55 (61.7) | 26 (63.6) | 180 (56.5) |
| No answer/I don't know, n (%)    | 0 (0)      | 0 (0)     | 1 (1.1)   | 0 (0)     | 1 (0.3)    |
| <b>Vegetable oil</b>             |            |           |           |           |            |
| Rarely or never, n (%)           | 9 (7.0)    | 6 (10.0)  | 6 (6.7)   | 5 (12.2)  | 26 (8.2)   |
| Once or twice a week, n (%)      | 24 (18.6)  | 12 (20.0) | 14 (15.7) | 2 (4.8)   | 52 (16.3)  |
| Three to six times a week, n (%) | 44 (34.1)  | 23 (38.3) | 33 (37.1) | 18 (43.9) | 118 (37.0) |
| At least once a day, n (%)       | 50 (38.8)  | 19 (31.7) | 31 (34.9) | 15 (36.6) | 115 (36.1) |
| No answer/I don't know, n (%)    | 2 (1.6)    | 0 (0.0)   | 5 (5.6)   | 1 (2.4)   | 8 (2.5)    |
| <b>Salted snacks</b>             |            |           |           |           |            |
| Rarely or never, n (%)           | 77 (59.7)  | 46 (76.7) | 53 (59.6) | 28 (68.3) | 204 (63.9) |
| Once or twice a week, n (%)      | 22 (17.1)  | 9 (15.0)  | 16 (18.0) | 4 (9.7)   | 51 (16.0)  |
| Three to six times a week, n (%) | 21 (16.3)  | 3 (5.0)   | 12 (13.5) | 8 (19.5)  | 44 (13.8)  |
| At least once a day, n (%)       | 8 (6.3)    | 1 (1.7)   | 7 (7.7)   | 1 (2.4)   | 17 (5.3)   |
| No answer/I don't know, n (%)    | 1 (0.8)    | 1 (1.7)   | 1 (1.1)   | 0 (0)     | 3 (0.9)    |
| <b>Sweets</b>                    |            |           |           |           |            |
| Rarely or never, n (%)           | 29 (22.5)  | 14 (23.3) | 20 (22.5) | 7 (17.1)  | 70 (21.9)  |
| Once or twice a week, n (%)      | 33 (25.6)  | 16 (26.6) | 26 (29.2) | 13 (31.8) | 88 (27.5)  |
| Three to six times a week, n (%) | 26 (20.2)  | 11 (18.4) | 21 (23.6) | 8 (19.5)  | 66 (20.7)  |
| At least once a day, n (%)       | 39 (30.3)  | 19 (31.7) | 21 (23.6) | 13 (31.8) | 92 (28.8)  |
| No answer/I don't know, n (%)    | 2 (1.6)    | 0 (0)     | 1 (1.1)   | 0 (0)     | 3 (0.9)    |
| <b>Sweetened drinks</b>          |            |           |           |           |            |
| Rarely or never, n (%)           | 77 (59.7)  | 40 (66.7) | 53 (59.6) | 31 (75.6) | 201 (63.0) |
| Once or twice a week, n (%)      | 14 (10.8)  | 5 (8.4)   | 8 (9.0)   | 3 (7.3)   | 30 (9.4)   |
| Three to six times a week, n (%) | 13 (10.1)  | 2 (3.3)   | 6 (6.7)   | 0 (0)     | 21 (6.6)   |
| At least once a day, n (%)       | 24 (18.7)  | 13 (21.6) | 20 (22.5) | 7 (17.1)  | 64 (20.1)  |
| No answer/I don't know, n (%)    | 1 (0.8)    | 0 (0)     | 2 (2.2)   | 0 (0)     | 3 (0.9)    |
| <b>Unsalted nuts</b>             |            |           |           |           |            |
| Rarely or never, n (%)           | 85 (65.9)  | 37 (61.7) | 63 (70.8) | 28 (65.9) | 212 (66.5) |
| Once or twice a week, n (%)      | 18 (14.0)  | 10 (16.7) | 11 (12.4) | 5 (12.2)  | 44 (13.8)  |
| Three to six times a week, n (%) | 14 (10.8)  | 6 (10.0)  | 4 (4.5)   | 3 (7.3)   | 27 (8.4)   |
| At least once a day, n (%)       | 9 (7.0)    | 7 (11.7)  | 7 (7.9)   | 6 (14.6)  | 29 (9.1)   |
| No answer/I don't know, n (%)    | 3 (2.3)    | 0 (0)     | 4 (4.5)   | 0 (0)     | 7 (2.2)    |
| <b>Alcohol</b>                   |            |           |           |           |            |
| Rarely or never, n (%)           | 60 (46.5)  | 35 (58.3) | 44 (49.4) | 30 (73.2) | 169 (53.0) |
| Once or twice a week, n (%)      | 21 (16.3)  | 12 (20.0) | 17 (19.1) | 4 (9.7)   | 54 (16.9)  |
| Three to six times a week, n (%) | 20 (15.6)  | 5 (8.4)   | 8 (9.0)   | 3 (7.3)   | 36 (11.3)  |
| At least once a day, n (%)       | 27 (20.9)  | 8 (13.4)  | 18 (20.3) | 4 (9.7)   | 57 (17.8)  |
| No answer/I don't know, n (%)    | 1 (0.8)    | 0 (0)     | 2 (2.2)   | 0 (0)     | 3 (0.9)    |

Notes. If not otherwise indicated, all values are presented as absolute frequency (n) and percentage (%).
